# Supplementary material for: Carboxyphenyl-terpyridine-based series of gels for procedural visual recognition of multi-anions
Source: Royal Society of Chemistry journal article supplement (doi:10.1039/c8ay01679h), 2018-01-01
Supplement: c8ay01679h1.pdf [file c8ay01679h1.pdf]

## Electrolic supplementary information

### Carboxyphenyl-terpyridine-based a series of gels for procedural visual recognition of multi-anions

Dan Yuan <sup>[a]</sup> and Yuan Fang Li\*<sup>[a]</sup>

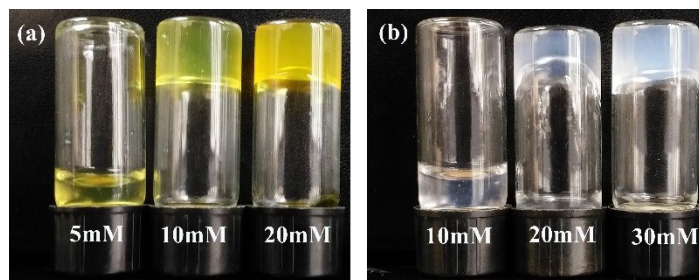

**Figure S1** Photographs of Hcpty in presence of different concentration of  $\text{Cr}_2\text{O}_7^{2-}$  and  $\text{H}_2\text{PO}_4^-$  respectively. (a)  $\text{Cr}_2\text{O}_7^{2-}$  (b)  $\text{H}_2\text{PO}_4^-$ . Numbers on the cap indicates the concentration of anions.

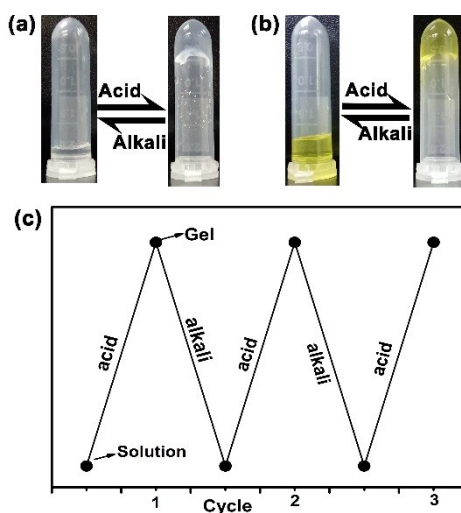

**Figure S2** The solution-gel transformation of (a)  $\text{H}_2\text{PO}_4^-$  - Hcpty system (b)  $\text{Cr}_2\text{O}_7^{2-}$  - Hcpty system by alternating addition of acid and alkali. (c) The “solution-gel” cycles of  $\text{H}_2\text{PO}_4^-$ - Hcpty and  $\text{Cr}_2\text{O}_7^{2-}$  - Hcpty system, controlled by the alternative addition of  $\text{H}^+$  and  $\text{OH}^-$ .

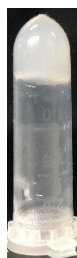

**Figure S3** Photograph of the gel formation with addition of  $\text{H}^+$  to the Hcpty solution.

**Table S1.** The gel formation in different solvents. Note for abbreviations: Gel (G), No Gel (NG). Ligand Hcptpy (L), Metal ions (M).

| Mg-MOG |   |                                  |      |     |                   |                    | Ba-MOG                           |   |   |                                  |      |     |                   |                    |                                  |
|--------|---|----------------------------------|------|-----|-------------------|--------------------|----------------------------------|---|---|----------------------------------|------|-----|-------------------|--------------------|----------------------------------|
| M      | L | H <sub>2</sub> O                 | DMSO | DMF | CHCl <sub>3</sub> | CH <sub>3</sub> OH | C <sub>2</sub> H <sub>5</sub> OH | M | L | H <sub>2</sub> O                 | DMSO | DMF | CHCl <sub>3</sub> | CH <sub>3</sub> OH | C <sub>2</sub> H <sub>5</sub> OH |
|        |   | G                                | G    | NG  | NG                | NG                 | NG                               |   |   | G                                | G    | G   | G                 | G                  | G                                |
|        |   | H <sub>2</sub> O                 | G    | NG  | NG                | NG                 | NG                               |   |   | H <sub>2</sub> O                 | G    | NG  | NG                | NG                 | NG                               |
|        |   | DMSO                             | G    | NG  | NG                | NG                 | NG                               |   |   | DMSO                             | G    | NG  | NG                | NG                 | NG                               |
|        |   | DMF                              | NG   | NG  | NG                | NG                 | NG                               |   |   | DMF                              | G    | NG  | NG                | NG                 | NG                               |
|        |   | CHCl <sub>3</sub>                | NG   | NG  | NG                | NG                 | NG                               |   |   | CHCl <sub>3</sub>                | G    | NG  | NG                | NG                 | NG                               |
|        |   | CH <sub>3</sub> OH               | NG   | NG  | NG                | NG                 | NG                               |   |   | CH <sub>3</sub> OH               | G    | NG  | NG                | NG                 | NG                               |
|        |   | C <sub>2</sub> H <sub>5</sub> OH | NG   | NG  | NG                | NG                 | NG                               |   |   | C <sub>2</sub> H <sub>5</sub> OH | G    | NG  | NG                | NG                 | NG                               |
| Cr-MOG |   |                                  |      |     |                   |                    | Cu-MOG                           |   |   |                                  |      |     |                   |                    |                                  |
| M      | L | H <sub>2</sub> O                 | DMSO | DMF | CHCl <sub>3</sub> | CH <sub>3</sub> OH | C <sub>2</sub> H <sub>5</sub> OH | M | L | H <sub>2</sub> O                 | DMSO | DMF | CHCl <sub>3</sub> | CH <sub>3</sub> OH | C <sub>2</sub> H <sub>5</sub> OH |
|        |   | G                                | NG   | NG  | NG                | NG                 | NG                               |   |   | G                                | G    | NG  | G                 | G                  |                                  |
|        |   | H <sub>2</sub> O                 | NG   | NG  | NG                | NG                 | NG                               |   |   | H <sub>2</sub> O                 | G    | NG  | NG                | NG                 | NG                               |
|        |   | DMSO                             | NG   | NG  | NG                | NG                 | NG                               |   |   | DMSO                             | G    | NG  | NG                | NG                 | NG                               |
|        |   | DMF                              | NG   | NG  | NG                | NG                 | NG                               |   |   | DMF                              | G    | NG  | NG                | NG                 | NG                               |
|        |   | CHCl <sub>3</sub>                | NG   | NG  | NG                | NG                 | NG                               |   |   | CHCl <sub>3</sub>                | NG   | NG  | NG                | NG                 | NG                               |
|        |   | CH <sub>3</sub> OH               | NG   | NG  | NG                | NG                 | NG                               |   |   | CH <sub>3</sub> OH               | G    | NG  | NG                | NG                 | NG                               |
|        |   | C <sub>2</sub> H <sub>5</sub> OH | NG   | NG  | NG                | NG                 | NG                               |   |   | C <sub>2</sub> H <sub>5</sub> OH | G    | NG  | NG                | NG                 | NG                               |
| Hg-MOG |   |                                  |      |     |                   |                    | Cd-MOG                           |   |   |                                  |      |     |                   |                    |                                  |
| M      | L | H <sub>2</sub> O                 | DMSO | DMF | CHCl <sub>3</sub> | CH <sub>3</sub> OH | C <sub>2</sub> H <sub>5</sub> OH | M | L | H <sub>2</sub> O                 | DMSO | DMF | CHCl <sub>3</sub> | CH <sub>3</sub> OH | C <sub>2</sub> H <sub>5</sub> OH |
|        |   | G                                | NG   | NG  | NG                | NG                 | NG                               |   |   | G                                | NG   | NG  | NG                | NG                 | NG                               |
|        |   | H <sub>2</sub> O                 | NG   | NG  | NG                | NG                 | NG                               |   |   | H <sub>2</sub> O                 | NG   | NG  | NG                | NG                 | NG                               |
|        |   | DMSO                             | NG   | NG  | NG                | NG                 | NG                               |   |   | DMSO                             | NG   | NG  | NG                | NG                 | NG                               |
|        |   | DMF                              | NG   | NG  | NG                | NG                 | NG                               |   |   | DMF                              | NG   | NG  | NG                | NG                 | NG                               |
|        |   | CHCl <sub>3</sub>                | NG   | NG  | NG                | NG                 | NG                               |   |   | CHCl <sub>3</sub>                | NG   | NG  | NG                | NG                 | NG                               |
|        |   | CH <sub>3</sub> OH               | NG   | NG  | NG                | NG                 | NG                               |   |   | CH <sub>3</sub> OH               | NG   | NG  | NG                | NG                 | NG                               |
|        |   | C <sub>2</sub> H <sub>5</sub> OH | NG   | NG  | NG                | NG                 | NG                               |   |   | C <sub>2</sub> H <sub>5</sub> OH | NG   | NG  | NG                | NG                 | NG                               |
| Sm-MOG |   |                                  |      |     |                   |                    | Eu-MOG                           |   |   |                                  |      |     |                   |                    |                                  |
| M      | L | H <sub>2</sub> O                 | DMSO | DMF | CHCl <sub>3</sub> | CH <sub>3</sub> OH | C <sub>2</sub> H <sub>5</sub> OH | M | L | H <sub>2</sub> O                 | DMSO | DMF | CHCl <sub>3</sub> | CH <sub>3</sub> OH | C <sub>2</sub> H <sub>5</sub> OH |
|        |   | G                                | NG   | NG  | NG                | G                  | G                                |   |   | G                                | NG   | NG  | NG                | G                  | G                                |
|        |   | H <sub>2</sub> O                 | NG   | NG  | NG                | NG                 | NG                               |   |   | H <sub>2</sub> O                 | NG   | NG  | NG                | NG                 | NG                               |
|        |   | DMSO                             | NG   | NG  | NG                | NG                 | NG                               |   |   | DMSO                             | NG   | NG  | NG                | NG                 | NG                               |
|        |   | DMF                              | NG   | NG  | NG                | NG                 | NG                               |   |   | DMF                              | NG   | NG  | NG                | NG                 | NG                               |
|        |   | CHCl <sub>3</sub>                | NG   | NG  | NG                | NG                 | NG                               |   |   | CHCl <sub>3</sub>                | NG   | NG  | NG                | NG                 | NG                               |
|        |   | CH <sub>3</sub> OH               | G    | NG  | NG                | NG                 | NG                               |   |   | CH <sub>3</sub> OH               | G    | NG  | NG                | NG                 | NG                               |
|        |   | C <sub>2</sub> H <sub>5</sub> OH | G    | NG  | NG                | NG                 | NG                               |   |   | C <sub>2</sub> H <sub>5</sub> OH | G    | NG  | NG                | NG                 | NG                               |
| Dy-MOG |   |                                  |      |     |                   |                    |                                  |   |   |                                  |      |     |                   |                    |                                  |
| M      | L | H <sub>2</sub> O                 | DMSO | DMF | CHCl <sub>3</sub> | CH <sub>3</sub> OH | C <sub>2</sub> H <sub>5</sub> OH |   |   |                                  |      |     |                   |                    |                                  |
|        |   | G                                | NG   | NG  | NG                | G                  | G                                |   |   |                                  |      |     |                   |                    |                                  |
|        |   | H <sub>2</sub> O                 | NG   | NG  | NG                | NG                 | NG                               |   |   |                                  |      |     |                   |                    |                                  |
|        |   | DMSO                             | NG   | NG  | NG                | NG                 | NG                               |   |   |                                  |      |     |                   |                    |                                  |
|        |   | DMF                              | NG   | NG  | NG                | NG                 | NG                               |   |   |                                  |      |     |                   |                    |                                  |
|        |   | CHCl <sub>3</sub>                | NG   | NG  | NG                | NG                 | NG                               |   |   |                                  |      |     |                   |                    |                                  |

|                                  |   |    |    |    |    |    |
|----------------------------------|---|----|----|----|----|----|
| CH <sub>3</sub> OH               | G | NG | NG | NG | NG | NG |
| C <sub>2</sub> H <sub>5</sub> OH | G | NG | NG | NG | NG | NG |

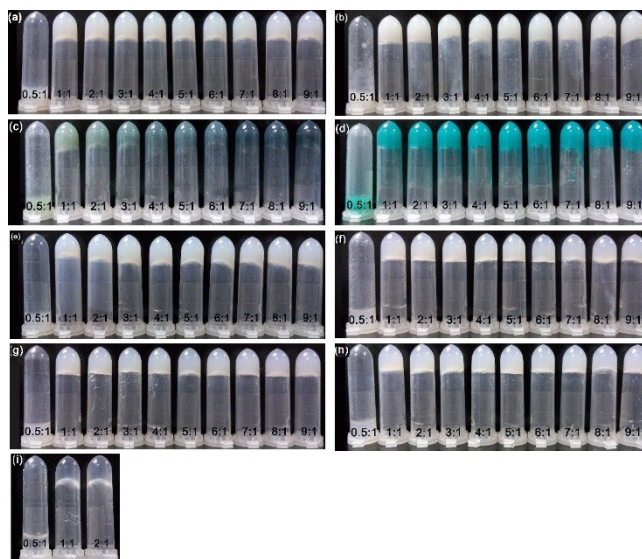

**Figure S4** Photographs of MOGs formation in different M/L ratios. (a) Mg-MOG (b) Ba-MOG (c) Cr-MOG (d) Cu-MOG (e) Cd-MOG (f) Sm-MOG (g) Eu-MOG (h) Dy-MOG (i) Hg-MOG. (Numbers on the EP tube indicates the equivalents of metal ion with respect to ligand present in the respective EP tube).

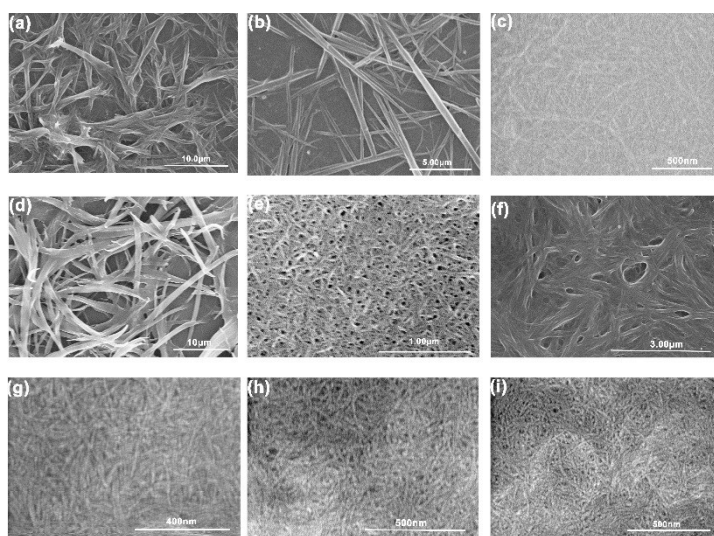

**Figure S5** SEM images of MOGs. (a) Mg-MOGs, (b) Ba-MOGs, (c) Cr-MOGs, (d) Cu-MOGs, (e) Hg-MOGs, (f) Cd-MOG, (g) Sm-MOG, (h) Eu-MOG, (i) Dy-MOG.

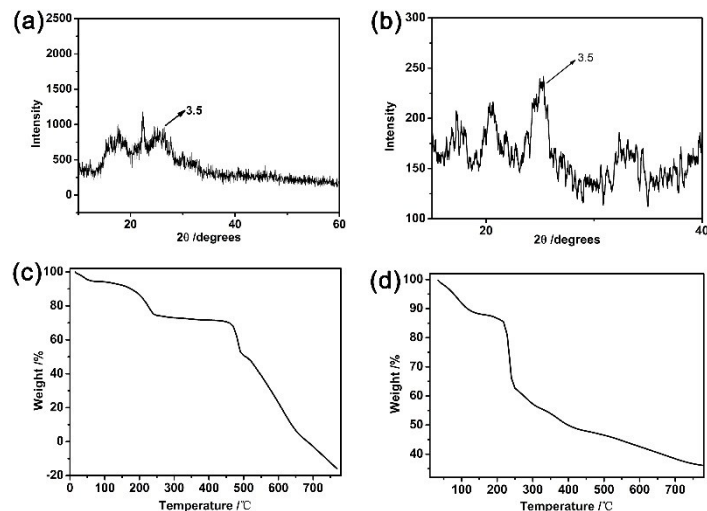

**Figure S6** X-ray diffraction (XRD) pattern of the (a) Cd-MOG and (b) Eu-MOG. TGA curve of the (c) Cd-MOG and (d) Eu-MOG.

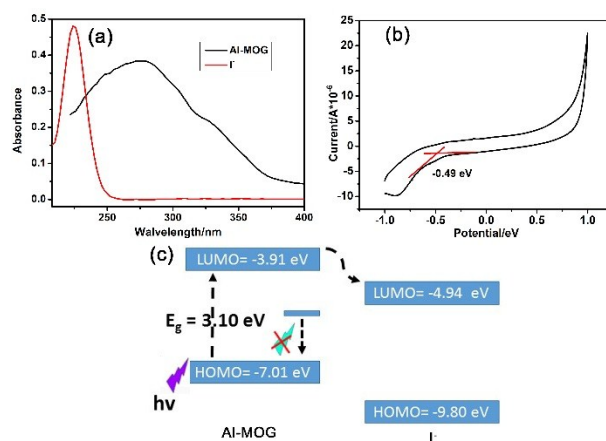

**Figure S7** (a) The UV-Vis absorption spectra of Al-MOG and I<sup>-</sup>. (b) Cyclic voltammograms of the Al-MOG. (c) The ELUMO and EHOMO of Al-MOG and I<sup>-</sup>.

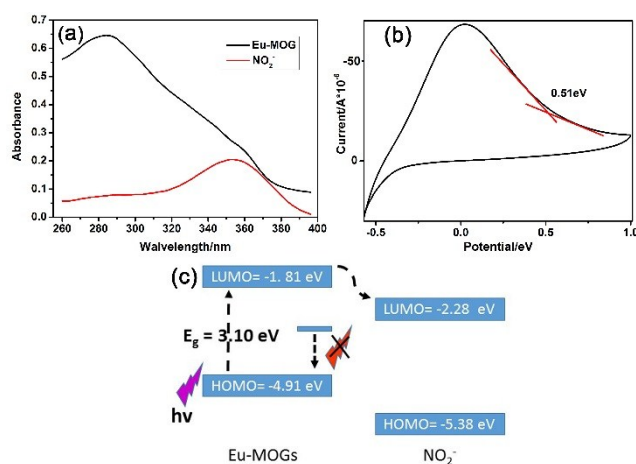

**Figure S8** (a) The UV-Vis absorption spectra of Eu-MOG and NO<sub>2</sub><sup>-</sup>. (b) Cyclic voltammograms of the Eu-MOG. (c) The ELUMO and EHOMO of Eu-MOG and NO<sub>2</sub><sup>-</sup>.

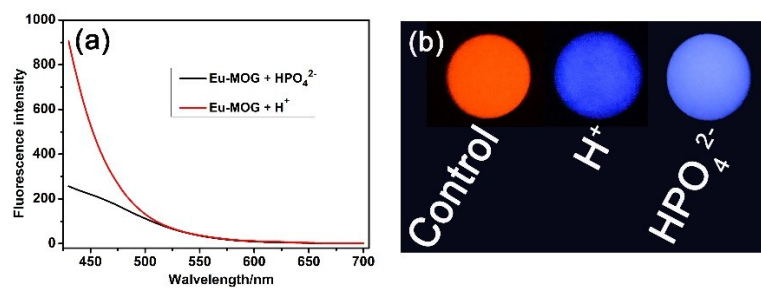

**Figure S9** (a) The fluorescence spectrum and (b) the photograph under the 365 nm UV lamp of Eu-MOG with addition of  $\text{HPO}_4^{2-}$  and  $\text{H}^+$  respectively (20 mmol/L).
